# Supplementary material for: North American Propolis Extracts From Upstate New York Decrease Nosema ceranae (Microsporidia) Spore Levels in Honey Bees (Apis mellifera)
Source: Front Microbiol. 2020 Jul 22;11:1719. doi: 10.3389/fmicb.2020.01719 (PMC7387503; doi:10.3389/fmicb.2020.01719)
Supplement: Supplementary file 3 [file Table_1.xlsx]

## Sheet: Sheet1
	Fig1 (spore/bee)							Fig 2a (spore/bee)					Fig 2b (spore/bee)
	DE	VC	PC	ME	EE			DE	ME	EE	VC		DCM 0.1	DCM 1	DCM 10	DCM 100	control
	12500	187500	275000	37500	75000			7500	90000	62500	130000		200000	175000	50000	37500	175000
	0	125000	237500	150000	62500			37500	117500	55000	100000		75000	87500	87500	25000	187500
	50000	137500	237500	12500	25000			32500	92500	65000	115000		75000	75000	50000	25000	150000
	37500	125000	187500	75000	37500			40000	72500	55000	100000		150000	50000	50000	12500	125000
	87500	87500	187500	25000	87500			7500	87500	65000	95000		100000	112500	37500	0	75000
	50000	125000	225000	37500	12500			52500	50000	80000	100000		162500	150000	62500	12500	100000
	12500	175000	187500	25000	25000			5000	70000	47500	110000		137500	125000	0	37500	150000
	50000	175000	187500	137500	12500			22500	102500	77500	95000		62500	112500	0	0	150000			fig 3 - %dead spores
	12500	212500	200000	50000	100000			67500	120000	85000	185000		75000	75000	100000	50000	212500			HK	VC	DE	ME	EE
	12500	112500	162500	62500	50000			22500	52500	72500	205000		12500	137500	75000	25000	112500			100	0	0	2.8	4.5
	37500	175000	250000	150000	37500			30000	102500	35000	177500		87500	150000	50000	0	87500			100	7.14	5.76	2.63	8.33
	25000	162500	137500	112500	37500			5000	40000	25000	40000		150000	112500	75000	50000	225000			100	6	6.06	2.5	7.14
	12500	287500	50000	87500	62500			25000	85000	57500	132500		125000	25000	100000	12500	175000
	62500	187500	250000	50000	25000			25000	117500	55000	85000		150000	87500	50000	25000	125000
	50000	87500	237500	37500	37500			35000	45000	52500	100000		150000	12500	112500	12500	137500
	25000	200000	137500	50000	37500			17500	22500	47500	200000		62500	100000	50000	25000	75000
	0	212500	262500	50000	12500			40000	37500	32500	85000		162500	50000	50000	25000	50000
	50000	137500	150000	112500	37500			17500	75000	50000	112500		87500	25000	75000	25000	75000
	25000	137500	175000	100000	50000			32500	107500	50000	210000		100000	87500	62500	37500	150000
	25000	150000	112500	87500	25000			25000	62500	60000	67500		112500	112500	62500	25000	75000
	75000	137500	137500	50000	25000			37500	62500	60000	50000		62500	87500	37500	50000	137500
	50000	125000	87500	50000	37500			17500	77500	50000	82500		125000	12500	112500	12500	125000
	12500	37500	150000	25000	12500			10000	100000	80000	125000			62500	37500	25000	87500
	37500	175000	125000	137500	25000
	25000	150000	50000	62500	62500
	0	137500	225000	50000	37500
	50000	212500	100000	12500	87500
	75000	87500		12500	25000
	25000			50000	50000
	25000				37500
	62500				50000
	25000
					25000
					112500
					12500
					100000
					25000
					100000
					25000
					12500
					12500
					25000
					75000
					87500
					12500
